# Supplementary material for: Combining temperature rate and level perspectives in emission metrics
Source: Copernicus journal article supplement (doi:10.5194/esd-2017-25), 2017-03-20
Supplement: Supplementary file 1 [file esd-2017-25-supplement.pdf]

1 **Combining temperature rate and level perspectives in emission**  
2 **metrics**

3 Borgar Aamaas<sup>1</sup>, Terje K. Berntsen<sup>1,2</sup>, Jan S. Fuglestedt<sup>1</sup>, Glen P. Peters<sup>1</sup>

4 <sup>1</sup>CICERO Center for International Climate Research, PB 1129 Blindern, 0318 Oslo, Norway

5 <sup>2</sup>Department of Geosciences, University of Oslo, Norway

6 *Correspondence to:* Borgar Aamaas (borgar.aamaas@cicero.oslo.no)

7 **1 Impact on natural systems**

8 Additional comments to that given in Sect. 1 about the velocity of climate change is given here. According to Settele  
9 et al. (2014), many species will not be able to keep track with climate change in the 21<sup>st</sup>. Among the species with  
10 lowest displacement capacity are herbaceous plants, trees, rodents, and primates.

11 **2 Pulse metrics**

12 It is well known that emissions of SLCFs give a strong and quick temperature response that decays fast, while  
13 emissions of LLGHGs give a more gradual temperature response that lasts for decades and centuries (e.g., Myhre et  
14 al., 2013). Figure S1(A) shows the temporal global temperature response due to pulse emissions of CO<sub>2</sub>, N<sub>2</sub>O, CH<sub>4</sub>,  
15 and BC. A schematic view compatible with Figs. 1 and 2 is presented in Fig. S1(B). For pulse emissions, this simple  
16 calculation indicates that the maximum temperature  $\Delta T$  occurs at 1 year for BC and 10 years for CH<sub>4</sub>. In comparison,  
17 the LLGHGs CO<sub>2</sub> and N<sub>2</sub>O have the maximum temperature increase occurring after about 22 and 26 years,  
18 respectively, and the perturbations last much longer. The timing of this peaking of the temperature change includes  
19 some uncertainty, as the metric parameterizations contain uncertainty, such as uncertainty in the IRF (Joos et al., 2013;  
20 Olivié and Peters, 2013).

21

### A) Temperature profile after pulse emissions

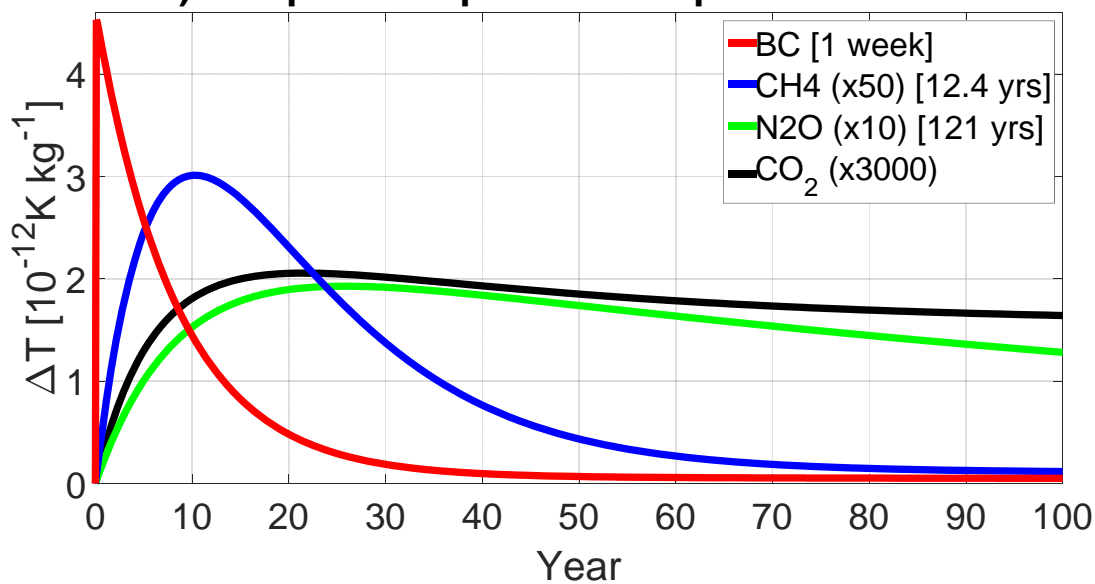

22

### B) Schematic temperature profile after pulse emissions

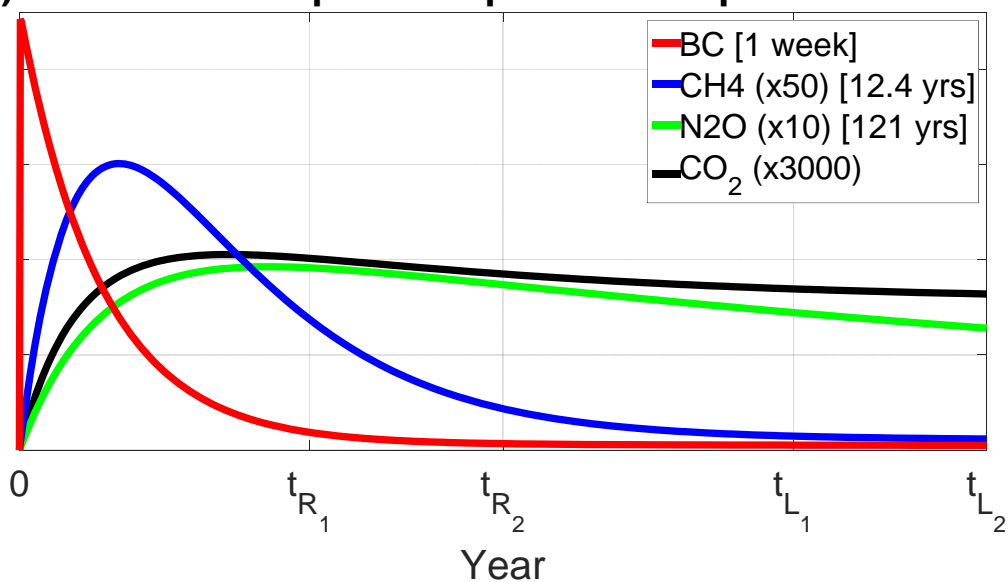

23

24 Figure S1: The global temperature perturbations due to pulse emissions for species (Myhre et al., 2013) representing  
 25 atmospheric perturbation timescales from weeks to centuries are given in A. The emission pulse at year 0 is 1 kg for BC, 50  
 26 kg for CH<sub>4</sub>, 10 kg for N<sub>2</sub>O, and 3000 kg for CO<sub>2</sub>. B gives a schematic view compatible with Figs. 1 and 2.

27

28 **3 Global temperature change and RCPs**

29 Historic and future temperature development according to the Representative Concentration Pathways (RCPs) (Collins  
30 et al., 2013) is shown in Figs. S2. Variability in the historic period shows that the decadal temperature change is not  
31 only governed by anthropogenic forcing, but also natural variability. Similarly, the future global and regional  
32 temperature trends will be determined by both anthropogenic emissions and natural variability in the climate system.  
33 The global temperature increase in the near future, the period 2016-2035 compared to 1986-2005, is by Kirtman et al.  
34 (2013) predicted to be in the 0.3-0.7 °C range, that is 0.1-0.23 °C/decade. Natural variability will sometimes increase  
35 and sometimes decrease the global temperature rate in the 21<sup>st</sup> century. Regional variability may also give larger  
36 temperature rates locally than expected based on the global mean changes. In the near-term, the temperature increase  
37 in the mid-latitudes due to anthropogenic emissions will be similar to what is expected from natural variability, while  
38 in the tropics and subtropics, the anthropogenic emissions will quicker lead the climate system to a state outside of  
39 current natural variability (Kirtman et al., 2013). This natural variability add uncertainty to how adaptable ecosystems  
40 are (Diffenbaugh and Field, 2013).

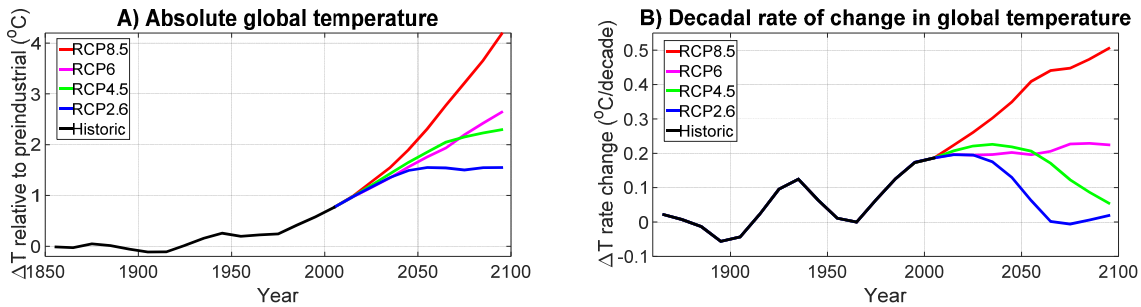

41

42 **Figure S2: A: The historic and future global temperature change in the 21<sup>st</sup> century according to the four RCPs (Collins et**  
43 **al., 2013). B: The smoothed decadal global temperature change for the same period and RCPs. Values are given for each**  
44 **decade, for instance the value in 2095 represents the difference in temperature between the period 2090-2099 and the period**  
45 **2080-2089.**

46

47 **4 Overshooting**

48 Level targets may be reached, although with a temporary temperature or radiative forcing peak above the long-term  
49 target, which is called overshooting. See Clarke et al. (2014) for an assessment of different emission pathways in the  
50 21<sup>st</sup> century. Figure S3 presents the decadal global temperature change in scenario pathways that lead to CO<sub>2</sub>  
51 concentrations of 430-480 ppm and 530-580 ppm, for overshooting and non-overshooting, based on the AR5 WG3  
52 Scenario database (Krey et al., 2014). The 430-480 ppm group equals to the RCP2.6. For the average of the 430-480  
53 ppm group, overshooting leads to a maximum in the global temperature rate increase that is about 0.02 °C/decade  
54 larger than otherwise and a rate increase of more than 0.2 °C/decade lasting about a decade longer. The discrepancy  
55 is even larger in the 530-580 ppm case, with a maximum rate increase that is about 0.03 °C/decade larger and the  
56 period of temperature increase above 0.2 °C/decade lasting about 20 years longer.

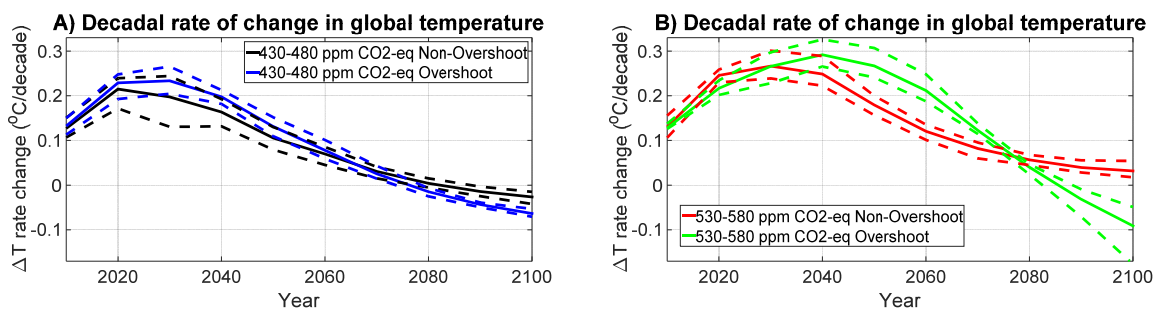

57

58 **Figure S3: The rate in global temperature change in the 21st century according to pathways that approach either level**  
59 **targets directly or via a temporary overshoot. Solid lines give the average of the scenario pathways, while the dotted lines**  
60 **give the 25<sup>th</sup> to 75<sup>th</sup> percentile of scenario outcomes. The scenario pathways classified in the group 430-480 ppm equals to**  
61 **the RCP2.6 (A) and the group 530-580 ppm to a radiative forcing of 3.7 Wm<sup>-2</sup> in 2100 (B). The figure is produced based on**  
62 **the AR5 WG3 Scenario database (Krey et al., 2014).**

63 **5 Different weighting of level and rate metrics**

64 Figures 3(A), 3(C), and 3(E) present values for the rate metric, level metric, and a combined metric that weight the  
65 level and rate targets equally. In Fig. S4, other weighting factors ( $\alpha$ ) are also presented for CH<sub>4</sub>, BC, and N<sub>2</sub>O. The  
66 higher the  $\alpha$  coefficient, the more is the combined metric value influenced by the rate metric.

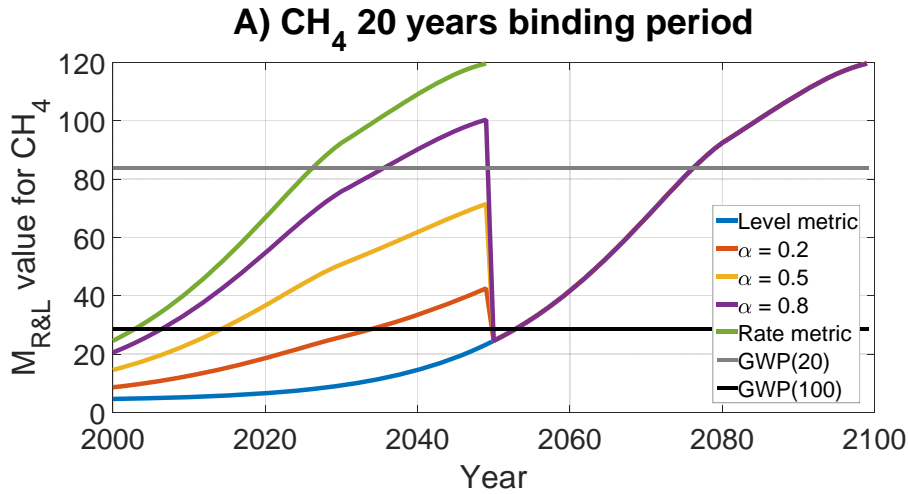

67

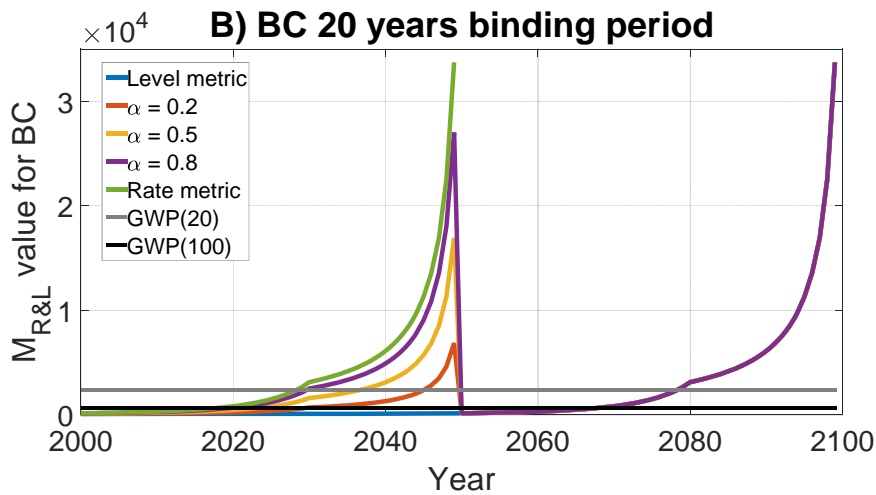

68

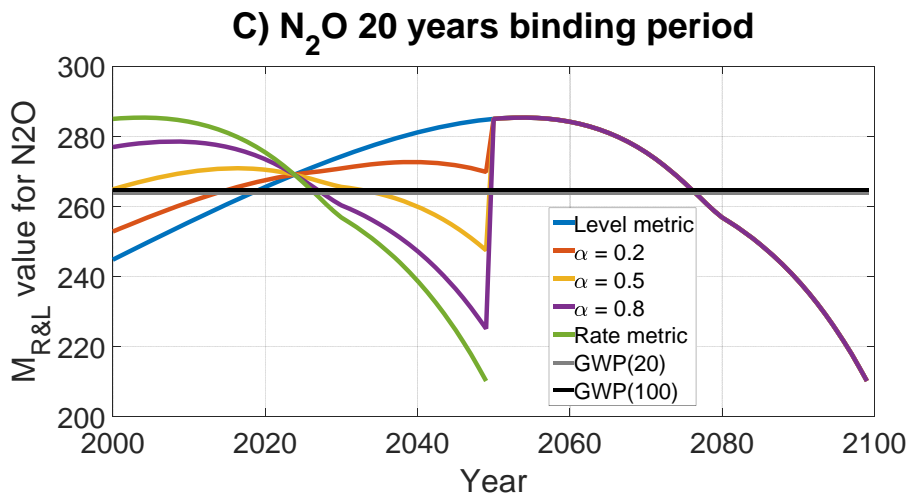

69

70 Figure S4: Metric values for the combined rate metrics for CH<sub>4</sub>, BC, and N<sub>2</sub>O given different weightings ( $\alpha$ ). The rate  
 71 constraint is binding for the period 2030-2049, and the level reached in 2100, which is the same as in Figs. 3(A), 3(C), and  
 72 3(E). GWP(20) and GWP(100) values are given as reference.

73 **6 Alternative combined metric**

74 Figures 3(A), 3(C), and 3(E) present values for the combined metric. In Fig. S5, we present the same case with the  
75 alternative combined metric presented in Eq. (5).

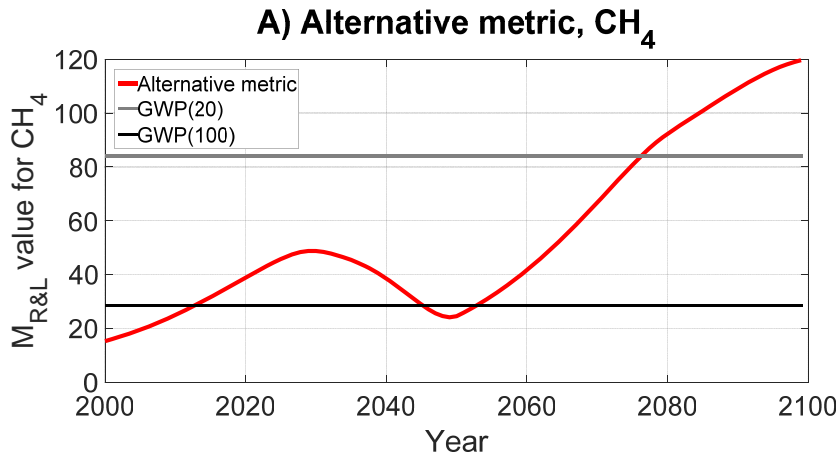

76

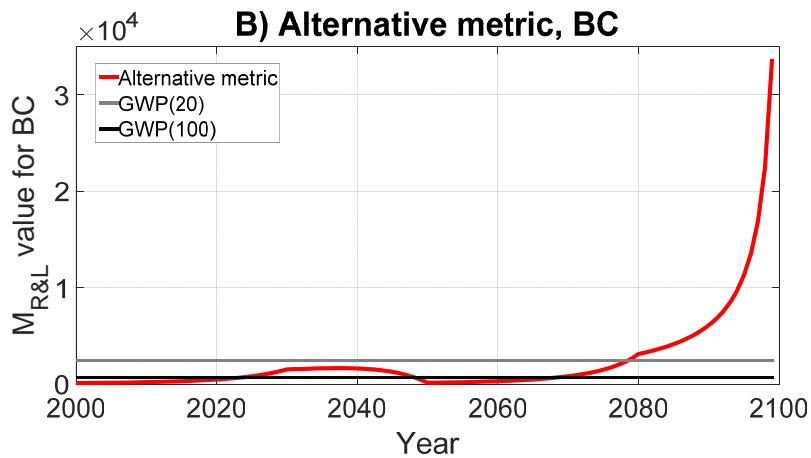

77

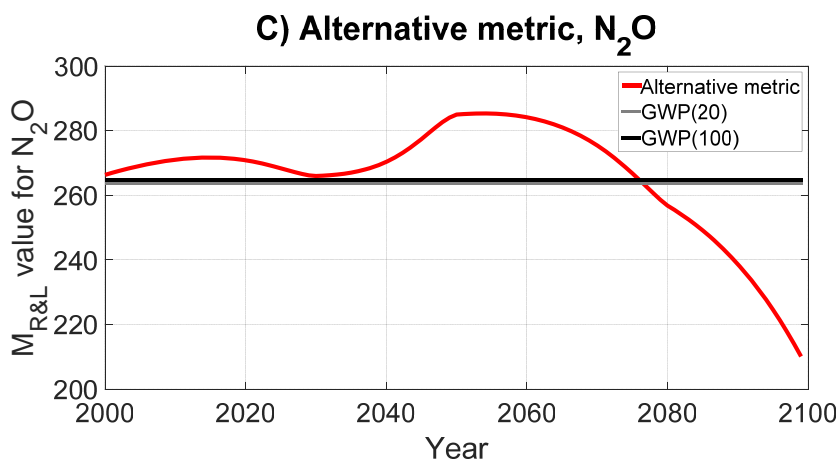

78

79 **Figure S5: Combined metric values given the alternative formulation, Eq. (5). For comparison with our selected metric**  
80 **equation, see Figs. 3(A), 3(C), and 3(E).**

81 **7 Weighting global emissions**

82 Figure 6 presents how global emissions of CO<sub>2</sub>, N<sub>2</sub>O, CH<sub>4</sub>, and BC in 2008 are weighted according to the emission  
83 metric values given in Fig. 3. Here, we show how the emissions are weighted differently if we assume that these  
84 emissions occur in 2020, 2030, 2040, or 2049 (see Figs. S6(A), S6(B), S6(C), and S6(D)). Figures S6(E), S6(F), and  
85 S6(G) focus on the temporal change. In Figs. S6(E) and S6(F), emissions are assumed constant for the rest of the 21<sup>st</sup>  
86 century while applying the level metric and rate metric, respectively. The combined metric is used in Fig. S6(G) with  
87 varying emissions following the RCP6.0 (IPCC, 2013). In this emission pathway, the emissions of SLCFs (BC and  
88 CH<sub>4</sub>) are reduced towards the end of the century while the emissions of LLGHGs (CO<sub>2</sub> and N<sub>2</sub>O) are larger in 2100  
89 than in 2008.

90

91

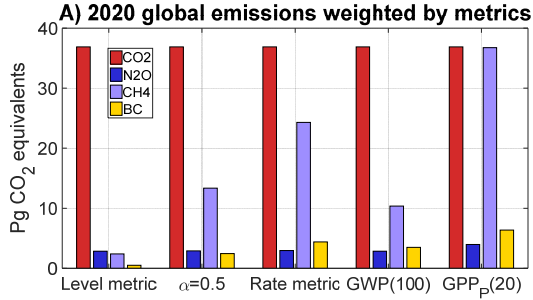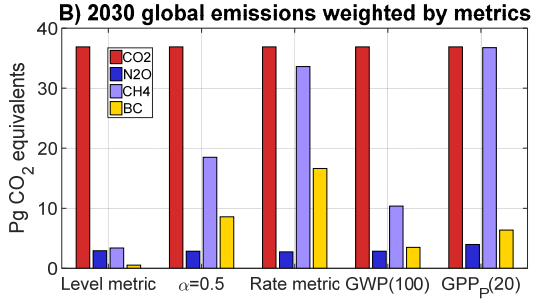

92

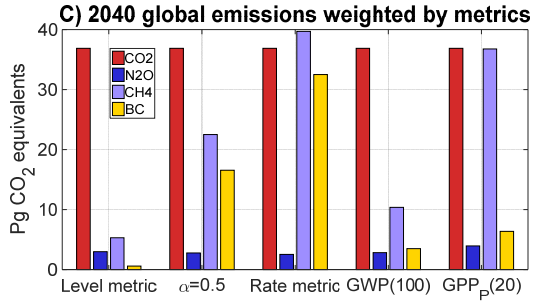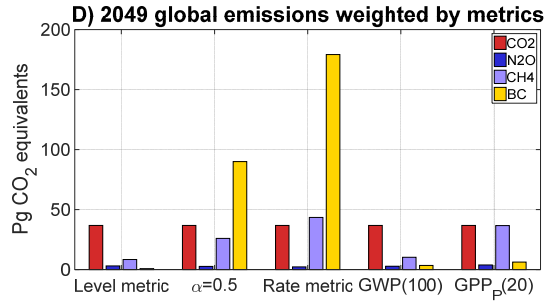

93

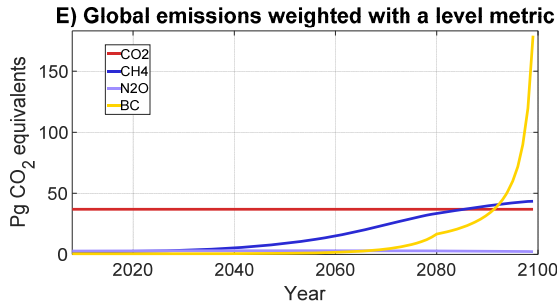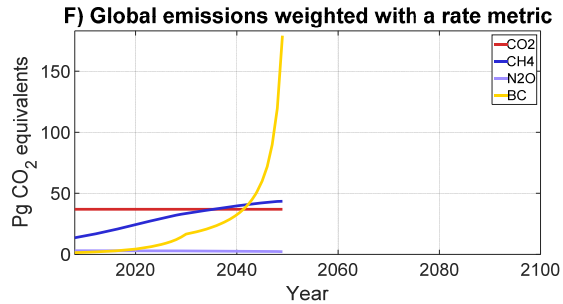

94

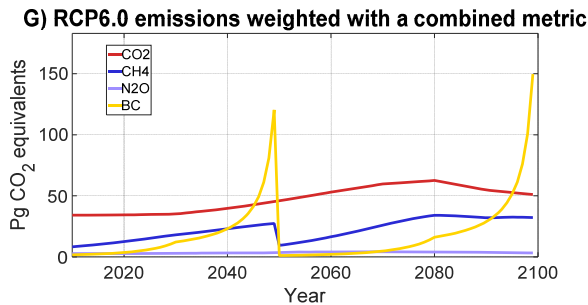

95 **Figure S6: The weighted global emissions for different emission metrics and time horizons. Five different emission metrics**  
 96 **are compared for global 2008 emissions occurring in 2020 (A), 2020 (B), 2040 (C), and 2049 (D). The calculations are based**  
 97 **on Fig. 3, with the rate constraint binding for the 2031-2050 period and level reached for the 2081-2100 period. The level**  
 98 **metric is here the same as  $\alpha=0$  and the rate metric equal to  $\alpha=1$ . The combined metric is given with equal weight of  $\alpha=0.5$ ,**  
 99 **while GWP(100) and GPP<sub>p</sub>(20) are shown for comparison. E and F show the temporal evolution based on the level metric**  
 100 **and rate metric, respectively, while keeping the emissions constant at the 2008 level. G is based on global emissions**  
 101 **according to the RCP6.0; thus, varying emissions until 2100.**

102



103 **8 Metric values based on RCPs**

104 The article focuses on idealized examples of how the level, rate, and combined metrics can be applied. In the article,  
105 we shortly give some examples based on the RCPs. The RCPs are the most applied scenarios or pathways in the  
106 literature. Here are some illustrations of the metrics for CH<sub>4</sub> based on RCP4.5 and RCP8.5 (Fig. S7). For RCP4.5, a  
107 rate constraint of 0.2 °C/decade gives a binding rate metric until 2050. 0.15 °C/decade results in binding until 2070,  
108 and 0.1 °C/decade binding until 2080. The rate increase never reaches 0.25 °C/decade, thus, the total metric value in  
109 this case is only dependent on the level target. In RCP8.5, the rate constraint is binding towards the end of the century  
110 due to increasing rate of temperature increase. The 0.3 °C/decade threshold is reached in 2040, while increases of 0.4  
111 °C/decade and 0.5 °C/decade starts occurring around 2050 and 2090, respectively. The target period for the  
112 temperature level is set to 2081-2100, which seems reasonable for RCP4.5, but not RCP8.5, given Fig. S2.

113 If RCP8.5 is applied (Fig. S7(B)), the combined metric is similar in shape as the level metric, just lifted. The earlier  
114 the start of the binding period of the rate constraint, the earlier the additional lift occurs. The later the binding starts,  
115 the smaller is the relative increase from a pure level metric. Metrics based on RCP4.5 are similar to those based on  
116 the baseline scenario presented in the article, but with slightly larger combined metric values in the beginning of the  
117 century as this period is rate constraint binding following RCP4.5, but not in the baseline scenario.

118 The paper selects 2081-2100 as the default target period for the level goal. If emissions follow RCP6.0 or RCP8.5, the  
119 temperature increase by the end of the 21<sup>st</sup> century will not have slowed down and is over 0.2 °C/decade and 0.5  
120 °C/decade, respectively (see Fig. S2(B)). These trends indicate that temperature peaking will occur after 2100 and  
121 may warrant a time horizon for the level target sometime after 2100. Another viewpoint is a focus on limiting the  
122 global warming to 2 °C and applying a time horizon when this target is met (Joshi et al., 2011) regardless of whether  
123 the global temperature is predicted to continue its increase afterwards. In that case, 2 °C does not represent a level.  
124 Temperature increases of 3 °C, 4 °C, or some other value could also be defined as a target level for the level metric.

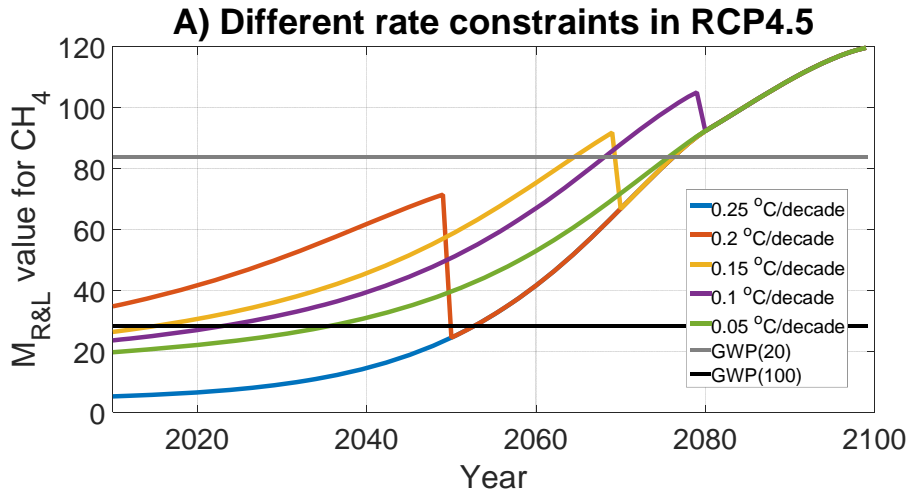

125

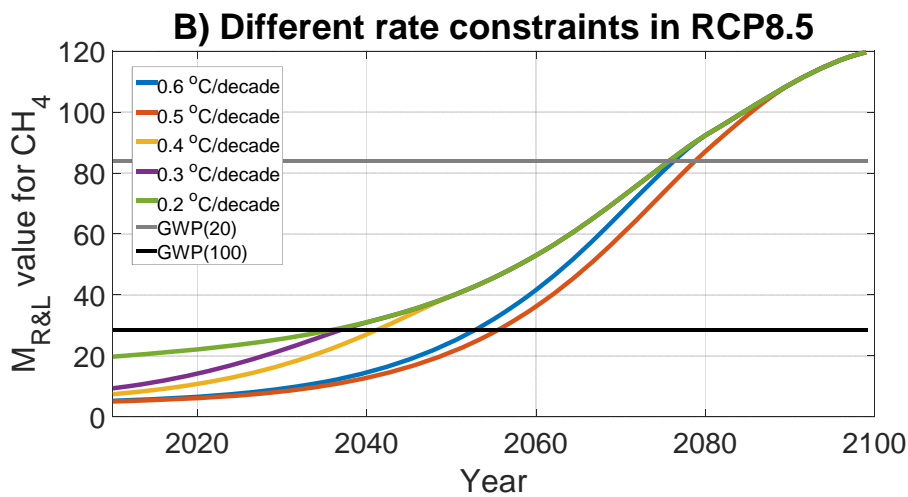

126

127 **Figure S7: Combined metric values for CH<sub>4</sub> for RCP4.5 (A) and RCP8.5 (B) given an equal weight of rate and level metrics**  
 128 **( $\alpha=0.5$ ) for different rate constraints, indicated by the temperature rate increase per decade. 2081-2100 is set as the level**  
 129 **target period. GWP(20) and GWP(100) values are given as reference.**

130 **References**

131

132 Clarke, L. et al., 2014. Assessing Transformation Pathways. In: O. Edenhofer et al. (Editors), Climate Change 2014: Mitigation of  
 133 Climate Change. Contribution of Working Group III to the Fifth Assessment Report of the Intergovernmental Panel on  
 134 Climate Change. Cambridge University Press, Cambridge, United Kingdom and New York, NY, USA.

135 Collins, M. et al., 2013. Long-term Climate Change: Projections, Commitments and Irreversibility. In: T.F. Stocker et al. (Editors),  
 136 Climate Change 2013: The Physical Science Basis. Contribution of Working Group I to the Fifth Assessment Report of  
 137 the Intergovernmental Panel on Climate Change. Cambridge University Press, Cambridge, United Kingdom and New  
 138 York, NY, USA, pp. 1029–1136.

139 Diffenbaugh, N.S. and Field, C.B., 2013. Changes in Ecologically Critical Terrestrial Climate Conditions. *Science*, 341(6145):  
 140 486-492.

141 IPCC, 2013. Annex II: Climate System Scenario Tables In: T.F. Stocker et al. (Editors), Climate Change 2013: The Physical  
142 Science Basis. Contribution of Working Group I to the Fifth Assessment Report of the Intergovernmental Panel on  
143 Climate Change. Cambridge University Press, Cambridge, United Kingdom and New York, NY, USA, pp. 1395–1446.  
144 Joos, F. et al., 2013. Carbon dioxide and climate impulse response functions for the computation of greenhouse gas metrics: A  
145 multi-model analysis. *Atmospheric Chemistry and Physics*, 13: 2793-2825.  
146 Joshi, M., Hawkins, E., Sutton, R., Lowe, J. and Frame, D., 2011. Projections of when temperature change will exceed 2 °C above  
147 pre-industrial levels. *Nature Clim. Change*, 1(8): 407-412.  
148 Kirtman, B. et al., 2013. Near-term Climate Change: Projections and Predictability. In: T.F. Stocker et al. (Editors), Climate Change  
149 2013: The Physical Science Basis. Contribution of Working Group I to the Fifth Assessment Report of the  
150 Intergovernmental Panel on Climate Change. Cambridge University Press, Cambridge, United Kingdom and New York,  
151 NY, USA.  
152 Krey, V. et al., 2014. Annex II: Metrics & Methodology. In: O. Edenhofer et al. (Editors), Climate Change 2014: Mitigation of  
153 Climate Change. Contribution of Working Group III to the Fifth Assessment Report of the Intergovernmental Panel on  
154 Climate Change. Cambridge University Press, Cambridge, United Kingdom and New York, NY, USA.  
155 Myhre, G. et al., 2013. Anthropogenic and Natural Radiative Forcing. In: T.F. Stocker et al. (Editors), Climate Change 2013: The  
156 Physical Science Basis. Contribution of Working Group I to the Fifth Assessment Report of the Intergovernmental Panel  
157 on Climate Change. Cambridge University Press, Cambridge, United Kingdom and New York, NY, USA.  
158 Olivié, D.J.L. and Peters, G., 2013. Variation in emission metrics due to variation in CO<sub>2</sub> and temperature impulse response  
159 functions. *Earth System Dynamics*, 4: 267-286.  
160 Settele, J. et al., 2014. Terrestrial and inland water systems. In: C.B. Field et al. (Editors), Climate Change 2014: Impacts,  
161 Adaptation, and Vulnerability. Part A: Global and Sectoral Aspects. Contribution of Working Group II to the Fifth  
162 Assessment Report of the Intergovernmental Panel on Climate Change. Cambridge University Press, Cambridge, United  
163 Kingdom and New York, NY, USA, pp. 271-359.

164
